# Supplementary material for: Design of a mechanically strong and highly stretchable thermoplastic silicone elastomer based on coulombic interactions
Source: Royal Society of Chemistry journal article supplement (doi:10.1039/d0ta01593h), 2020-01-01
Supplement: d0ta01593h1.pdf [file d0ta01593h1.pdf]

Electronic Supplementary Information for

**Design of A Mechanically Strong and Highly Stretchable  
Thermoplastic Silicone Elastomer Based on Coulombic  
Interactions**

Jinfeng Shi,<sup>a</sup> Na Zhao,<sup>a</sup> Dongying Yan,<sup>a</sup> Jianhui Song,<sup>a</sup> Wenxin Fu,<sup>\*b</sup> and Zhibo Li<sup>\*a</sup>

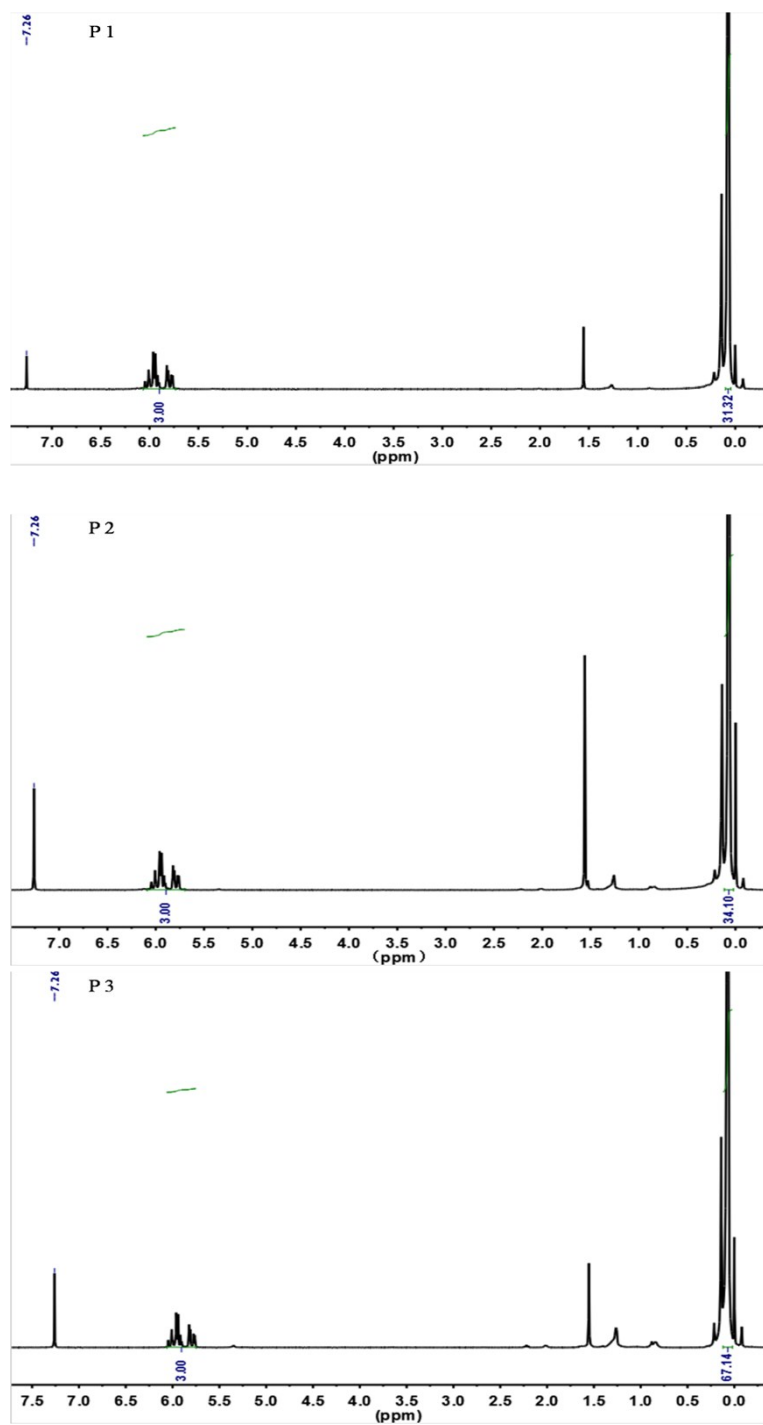

**Fig. S1**  $^1\text{H}$  NMR spectra of the P1, P2 and P3 in  $\text{CDCl}_3$ .

Mole fraction of vinyl groups in polymer was calculated as:

$\frac{I_{Vi}/3}{(I_{Vi}/3)+(I_{Me}/6)}$ ,  $I_{Vi}$  is the integral of vinyl protons at  $\delta = 5.5 - 6.3$  ppm,  $I_{Me}$  is the integral of methyl protons at  $\delta = 0 - 0.2$  ppm.

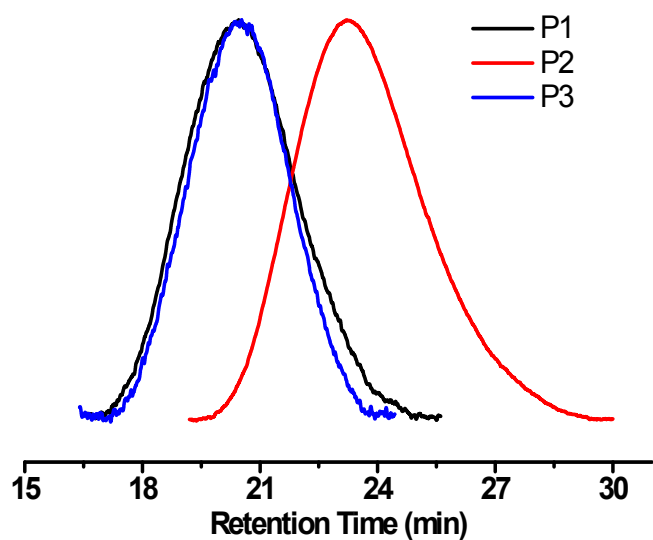

Fig. S2 GPC results of PDMS precursors.

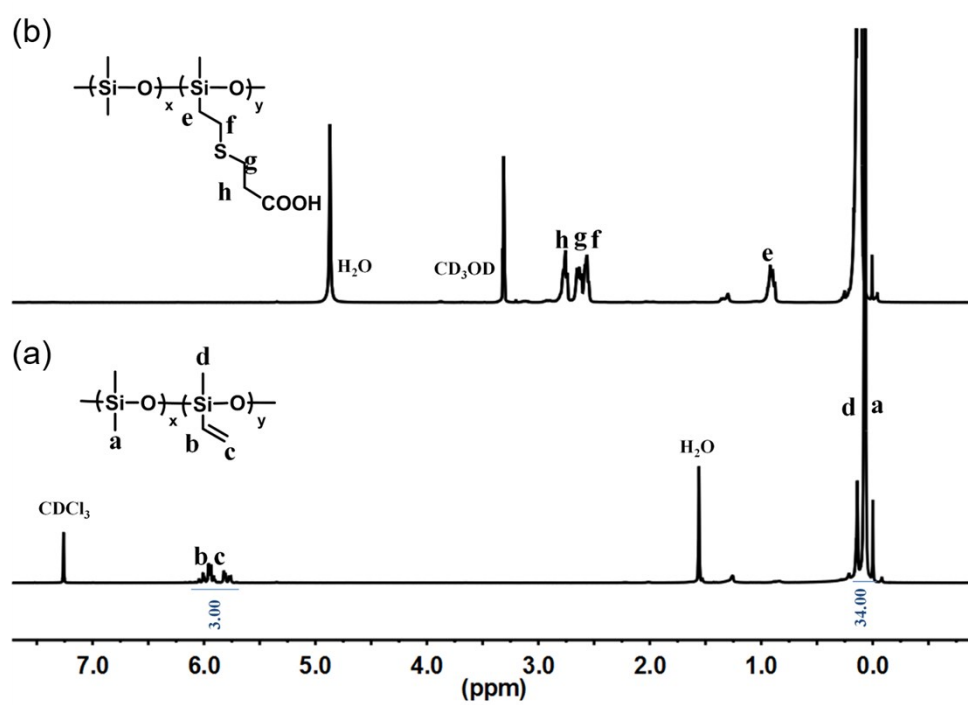

Fig. S3 <sup>1</sup>H NMR spectra of the (a) P2 in CDCl<sub>3</sub> and (b) P2-g-COOH in CD<sub>3</sub>OD.

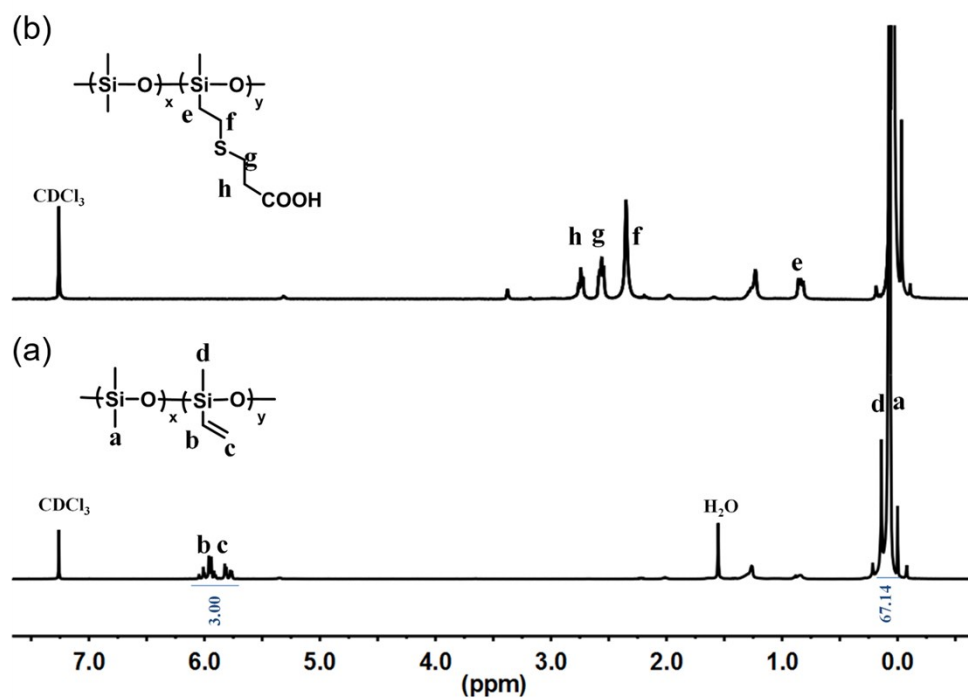

**Fig. S4** <sup>1</sup>H NMR spectra of (a) P3 in CDCl<sub>3</sub> and (b) P3-g-COOH in CDCl<sub>3</sub>.

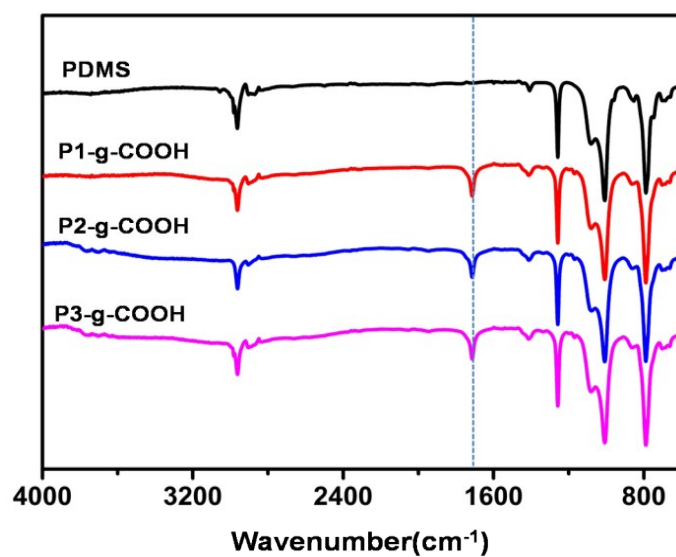

**Fig. S5** FTIR spectra of P1 PDMS, P1-g-COOH, P2-g-COOH, P3-g-COOH.

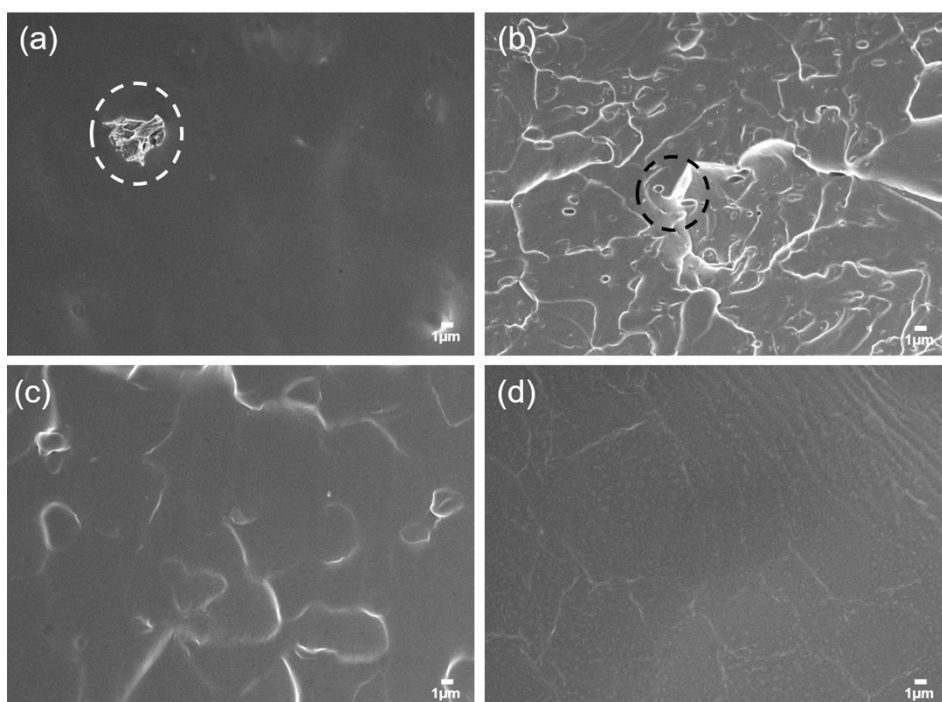

**Fig. S6** SEM images of the fractured surfaces of P1-g-COOH/ZnO elastomers: (a, b) COOH/ZnO=1/1 and (c, d) COOH/ZnO=2/1, (a, c) before and (b, d) after treated with 2.5 M hydrochloric acid solution for 5 min. (The scanning electron microscopy (SEM) images were obtained on a JSM-7500F SEM (from JEOL, Japan) at 5 kV. The fractured surfaces of the obtained elastomers were coated by a thin layer of gold before scanning.)

**Table S1** Tensile stress–strain results of PDMS-g-COOH/ZnO composites with molar ratio of COOH/ZnO = 1.5/1 at the stretching speed of 10 mm/min

| PDMS precursor | Breaking strength (MPa) | Elongation at break (%) |
|----------------|-------------------------|-------------------------|
| P1             | 5.68                    | 637                     |
| P2             | 4.11                    | 735                     |
| P3             | 4.62                    | 756                     |

**Table S2** Tensile stress–strain results of P1-g-COOH/ZnO composite with different molar ratios of COOH/ZnO at the stretching speed of 10 mm/min

| COOH/ZnO | Breaking strength (MPa) | Elongation at break (%) |
|----------|-------------------------|-------------------------|
| 2/1      | 3.08                    | 876                     |
| 1.5/1    | 5.68                    | 637                     |
| 1/1      | 6.47                    | 523                     |

**Table S3** Tensile stress–strain results of P1-g-COOH/ZnO composite with the molar ratio of COOH/ZnO = 2/1 at different stretching speeds

| Stretching speed (mm/min) | Breaking strength (MPa) | Elongation at break (%) |
|---------------------------|-------------------------|-------------------------|
|---------------------------|-------------------------|-------------------------|

|     |      |      |
|-----|------|------|
| 5   | 2.04 | 1300 |
| 10  | 3.08 | 876  |
| 50  | 5.13 | 660  |
| 100 | 5.47 | 483  |

**Table S4** Self-healing efficiencies of P1-g-COOH/ZnO composite with the molar ratio of COOH/ZnO = 1.5/1 at different T for 4 h

| T (°C) | healing efficiency of strain (%) | healing efficiency of strength (%) |
|--------|----------------------------------|------------------------------------|
| 30     | 9.3                              | 51.1                               |
| 50     | 55.3                             | 73.9                               |
| 80     | 107.7                            | 83.5                               |

**Table S5** Self-healing efficiencies of P1-g-COOH/ZnO composite with the molar ratio of COOH/ZnO = 1.5/1 at 80 °C after different durations

| t (h) | healing efficiency of strain (%) | healing efficiency of strength (%) |
|-------|----------------------------------|------------------------------------|
| 0.5   | 35.6                             | 57.0                               |
| 1     | 46.5                             | 59.0                               |
| 2     | 77.7                             | 77.6                               |
| 4     | 107.7                            | 83.5                               |
